# Supplementary material for: A Chemocentric Approach to the Identification of Cancer Targets
Source: PubMed Central journal article supplement (PMC3338416; doi:10.1371/journal.pone.0035582), 2012-04-25

|                                                                                                          |                                                                                                          |                                                                                                           |                                                                                                            |                                                                                                            |                                                                                                            |
|----------------------------------------------------------------------------------------------------------|----------------------------------------------------------------------------------------------------------|-----------------------------------------------------------------------------------------------------------|------------------------------------------------------------------------------------------------------------|------------------------------------------------------------------------------------------------------------|------------------------------------------------------------------------------------------------------------|
| <p>ALB-H00441995</p> 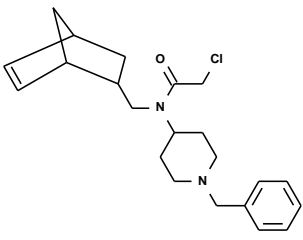     | <p>ALB-H0060049</p>      | <p>ALB-H00735197</p>    | <p>ALB-H00739584</p>     | <p>ALB-H00741434</p>     | <p>ALB-H00751202</p>     |
| <p>ALB-H00753699</p>    | <p>ALB-H00810012</p>    | <p>ALB-H00822700</p>    | <p>ALB-H00829834</p>    | <p>ALB-H00831742</p>    | <p>ALB-H01129023</p>    |
| <p>ALB-H01129467</p>   | <p>ALB-H01129723</p>   | <p>ALB-H01130455</p>   | <p>ALB-H01130627</p>   | <p>ALB-H01131842</p>   | <p>ALB-H01149429</p>   |
| <p>ALB-H01151015</p>  | <p>ALB-H01176322</p>  | <p>ALB-H01176330</p>  | <p>ALB-H01272585</p>  | <p>ALB-H01316829</p>  | <p>ALB-H01320674</p>  |

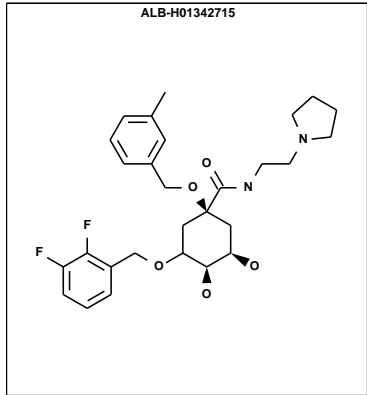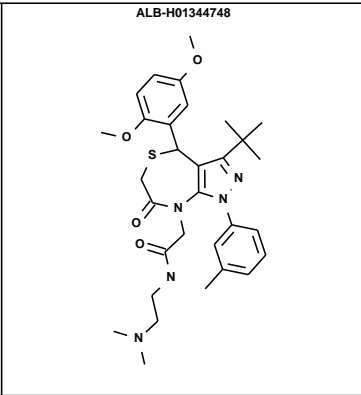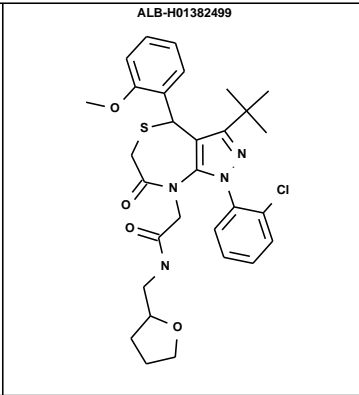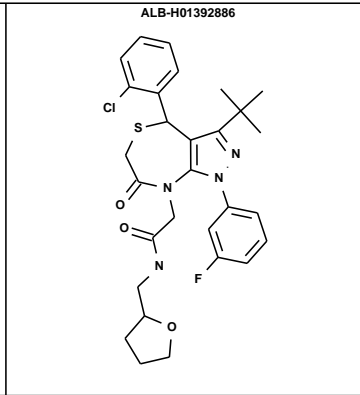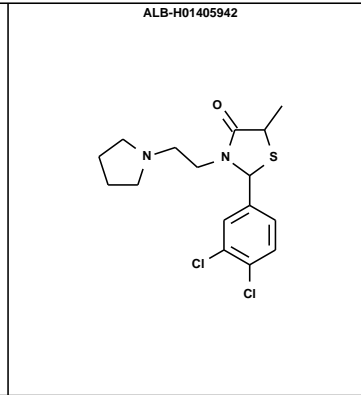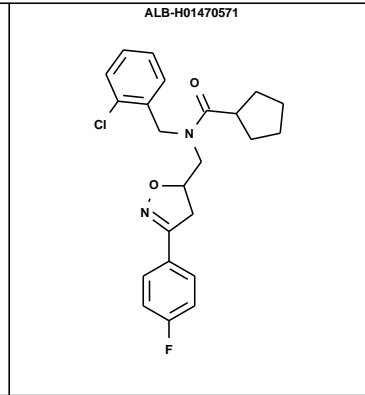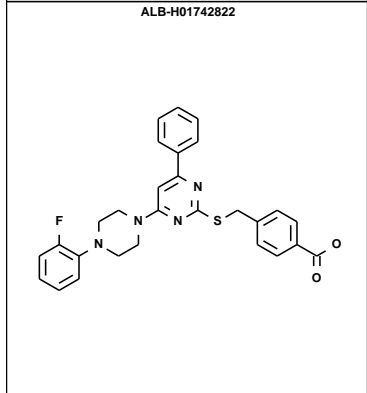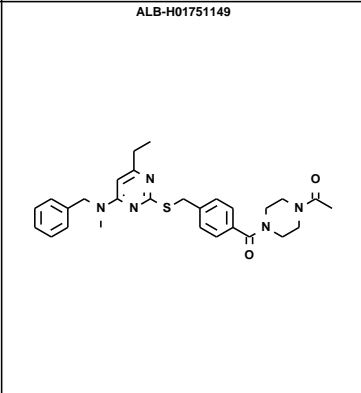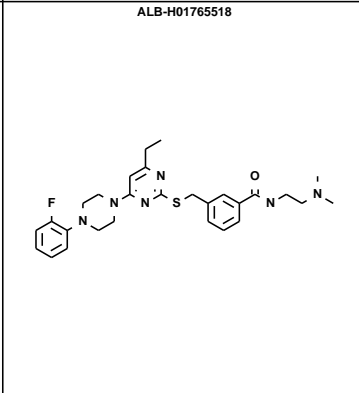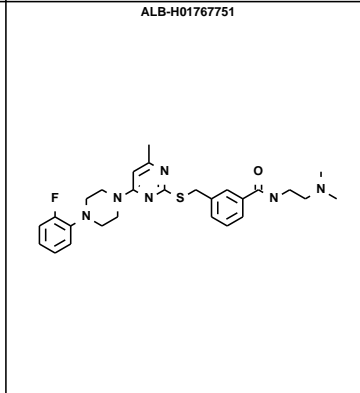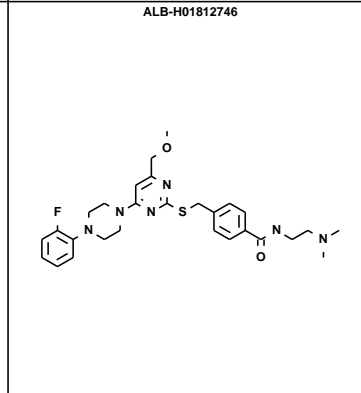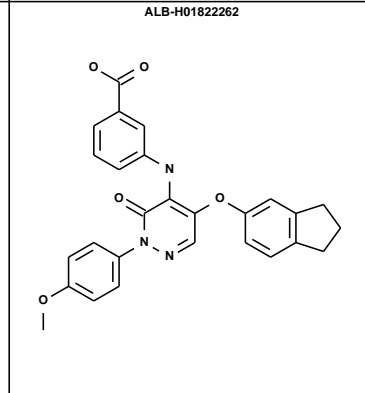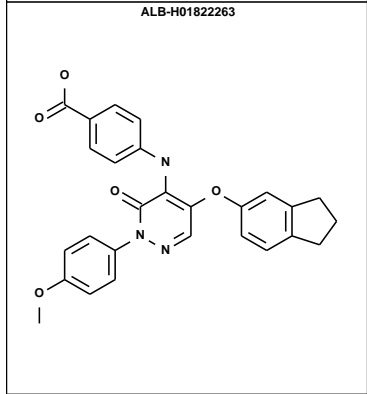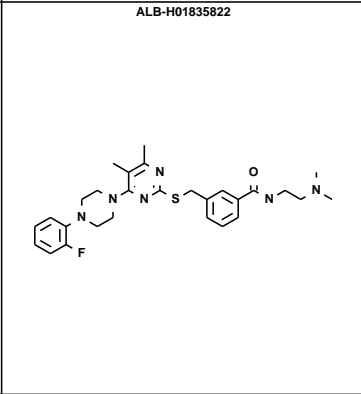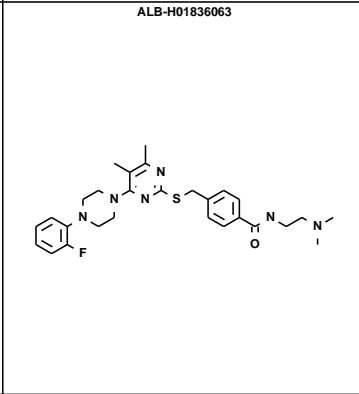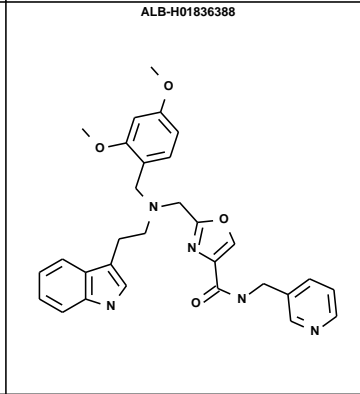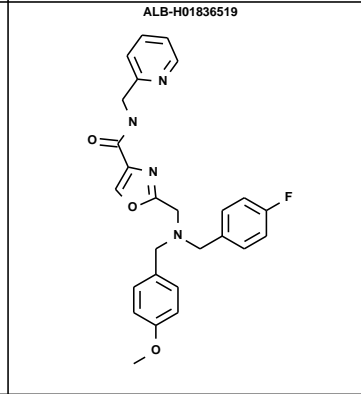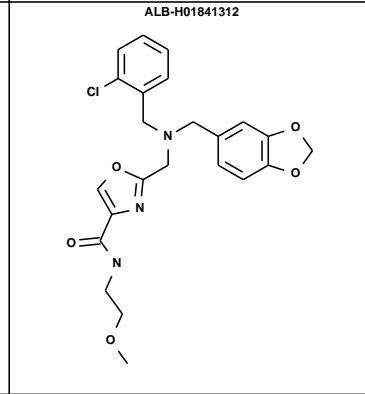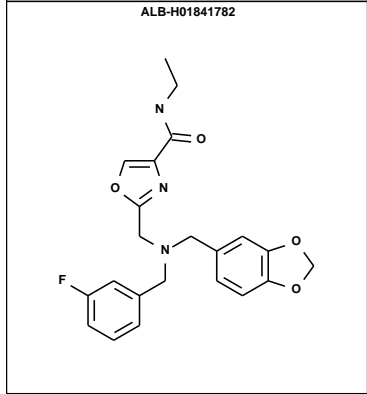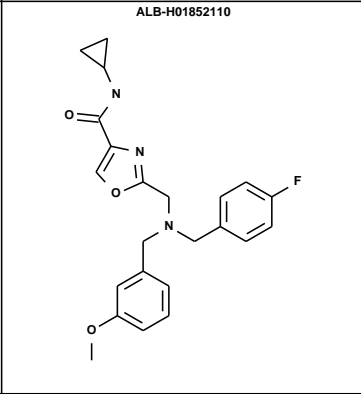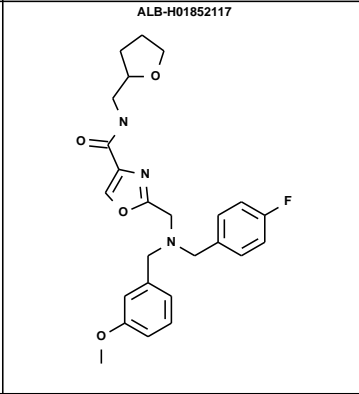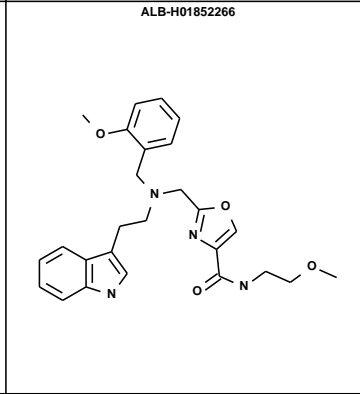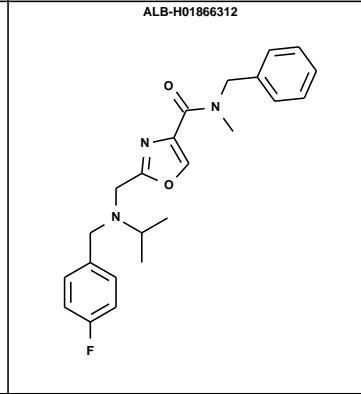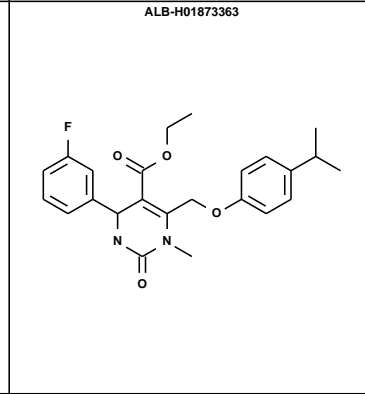

|                                                                                                         |                                                                                                          |                                                                                                           |                                                                                                            |                                                                                                            |                                                                                                            |
|---------------------------------------------------------------------------------------------------------|----------------------------------------------------------------------------------------------------------|-----------------------------------------------------------------------------------------------------------|------------------------------------------------------------------------------------------------------------|------------------------------------------------------------------------------------------------------------|------------------------------------------------------------------------------------------------------------|
| <p>ALB-H01873757</p> 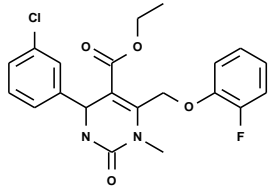   | <p>ALB-H01996281</p>    | <p>ALB-H01996644</p>    | <p>ALB-H01997188</p>    | <p>ALB-H01997751</p>    | <p>ALB-H01998750</p>    |
| <p>ALB-H01999230</p>   | <p>ALB-H01999271</p>    | <p>ALB-H01999383</p>    | <p>ALB-H01999454</p>    | <p>ALB-H01999604</p>    | <p>ALB-H01999633</p>    |
| <p>ALB-H01999905</p>  | <p>ALB-H02000179</p>   | <p>ALB-H02001373</p>   | <p>ALB-H02002740</p>   | <p>ALB-H02015571</p>   | <p>ALB-H02015653</p>   |
| <p>ALB-H02021273</p>  | <p>ALB-H02121188</p>  | <p>ALB-H02146008</p>  | <p>ALB-H02164105</p>  | <p>ALB-H02201908</p>  | <p>ALB-H02204633</p>  |

|                                                                                                          |                                                                                                          |                                                                                                           |                                                                                                            |                                                                                                            |                                                                                                            |
|----------------------------------------------------------------------------------------------------------|----------------------------------------------------------------------------------------------------------|-----------------------------------------------------------------------------------------------------------|------------------------------------------------------------------------------------------------------------|------------------------------------------------------------------------------------------------------------|------------------------------------------------------------------------------------------------------------|
| <p>ALB-H02206189</p> 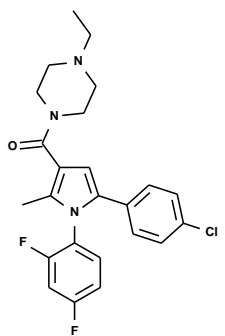    | <p>ALB-H02217146</p>     | <p>ALB-H02217160</p>     | <p>ALB-H02217620</p>     | <p>ALB-H02217807</p>     | <p>ALB-H02217808</p>     |
| <p>ALB-H03004996</p>    | <p>ALB-H03016026</p>    | <p>ALB-H03066396</p>    | <p>ALB-H03114063</p>    | <p>ALB-H03134961</p>    | <p>ALB-H03161338</p>    |
| <p>ALB-H03162903</p>   | <p>ALB-H03162935</p>   | <p>ALB-H03168075</p>   | <p>ALB-H03171195</p>   | <p>ALB-H03171234</p>   | <p>ALB-H03182139</p>   |
| <p>ALB-H03183574</p>  | <p>ALB-H03185558</p>  | <p>ALB-H03193308</p>  | <p>ALB-H03194044</p>  | <p>ALB-H03334056</p>  | <p>ALB-H03334102</p>  |

|                                                                                                          |                                                                                                          |                                                                                                           |                                                                                                            |                                                                                                            |                                                                                                            |
|----------------------------------------------------------------------------------------------------------|----------------------------------------------------------------------------------------------------------|-----------------------------------------------------------------------------------------------------------|------------------------------------------------------------------------------------------------------------|------------------------------------------------------------------------------------------------------------|------------------------------------------------------------------------------------------------------------|
| <p>ALB-H03334222</p> 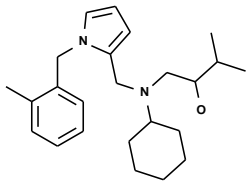   | <p>ALB-H03334668</p>    | <p>ALB-H03334710</p>     | <p>ALB-H03336206</p>     | <p>ALB-H03340074</p>     | <p>ALB-H03341329</p>    |
| <p>ALB-H04000668</p>    | <p>ALB-H04000828</p>    | <p>ALB-H04001268</p>    | <p>ALB-H04001287</p>    | <p>ALB-H04001486</p>    | <p>ALB-H04001488</p>    |
| <p>ALB-H04001490</p>    | <p>ALB-H04001781</p>   | <p>ALB-H04002026</p>   | <p>ALB-H04002047</p>   | <p>ALB-H04002176</p>   | <p>ALB-H04002182</p>   |
| <p>ALB-H04002467</p>  | <p>ALB-H04002546</p>  | <p>ALB-H04002761</p>  | <p>ALB-H04002766</p>  | <p>ALB-H04003637</p>  | <p>ALB-H04003702</p>  |

ALB-H04003748

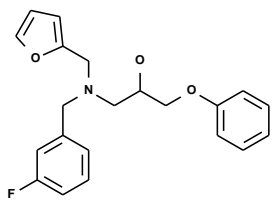

ALB-H04003768

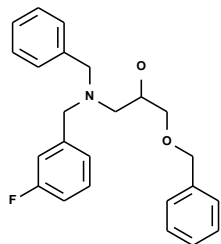

ALB-H04004034

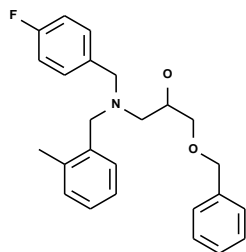

ALB-H04027354

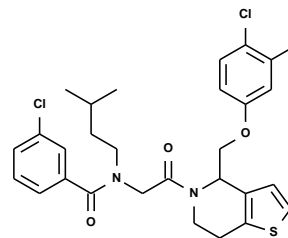

ALB-H04032862

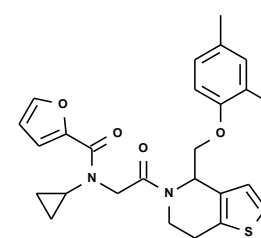

ALB-H04039207

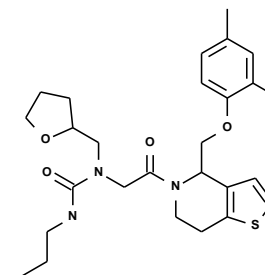

ALB-H04060999

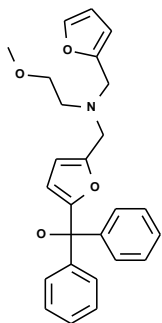

ALB-H04079334

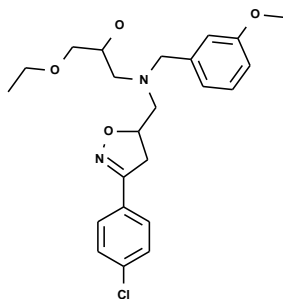

ALB-H04097978

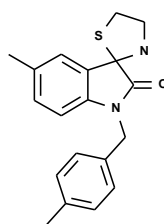

ALB-H04106388

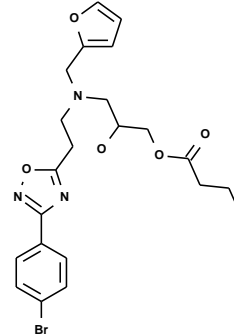

ALB-H04109844

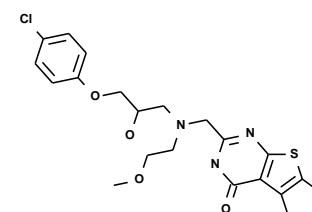

ALB-H04138872

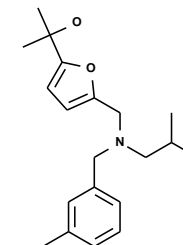

ALB-H04139590

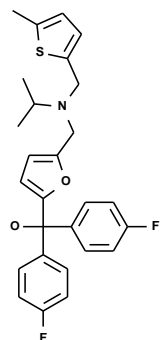

ALB-H04147525

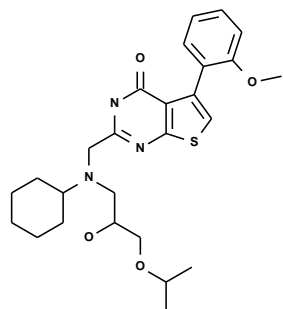

ALB-H04154848

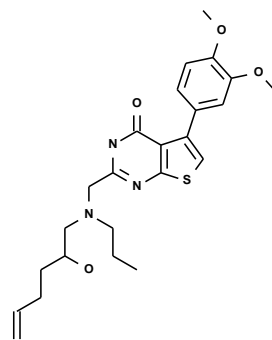

ALB-H04245819

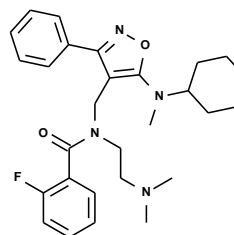

ALB-H04271771

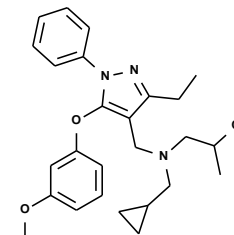

ALB-H04273923

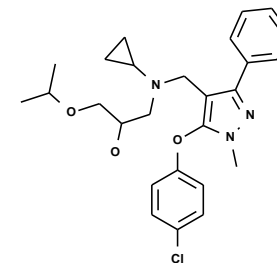

ALB-H04279679

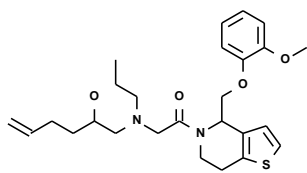

ALB-H04290857

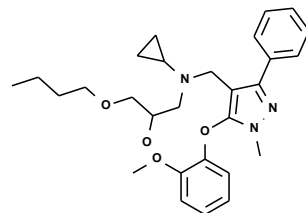

ALB-H04311305

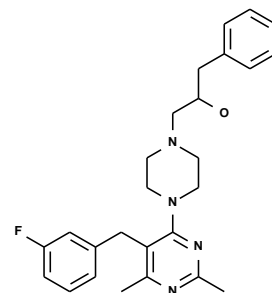

ALB-H04312401

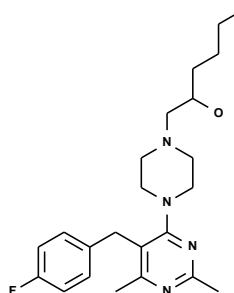

ALB-H04317289

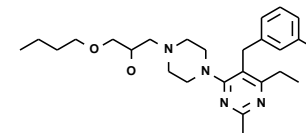

ALB-H04318609

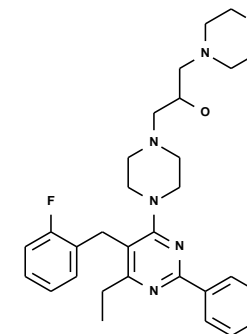

ALB-H04318784

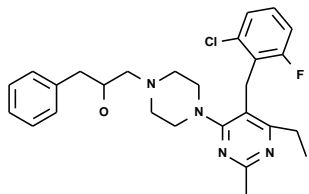

ALB-H04323998

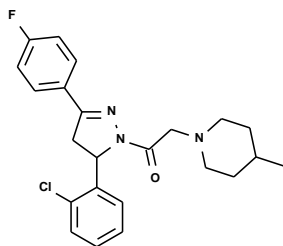

ALB-H04332437

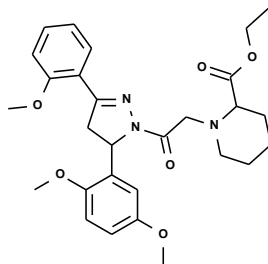

ALB-H04335442

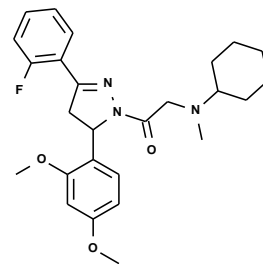

ALB-H04344946

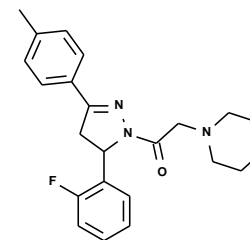

ALB-H04345135

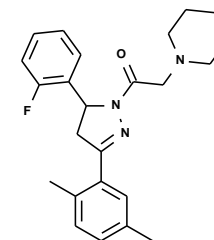

ALB-H04347021

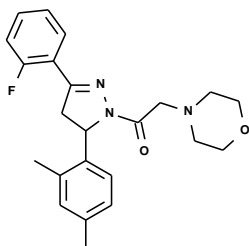

ALB-H04349347

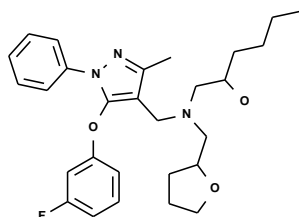

ALB-H04350886

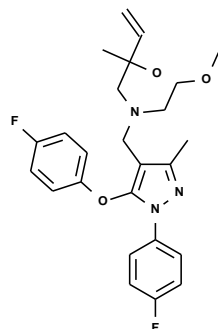

ALB-H04352561

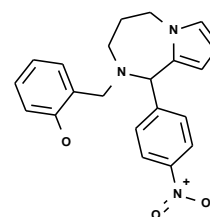

ALB-H04352577

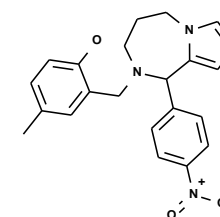

ALB-H04353431

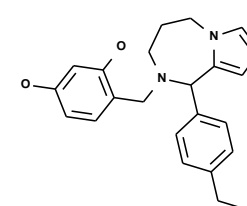

ALB-H04354534

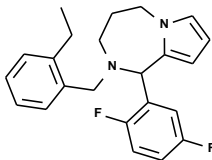

ALB-H04491222

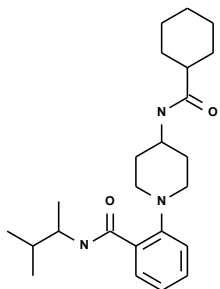

ALB-H09014869

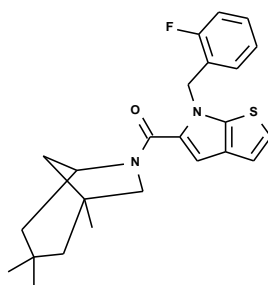

ALB-H09027575

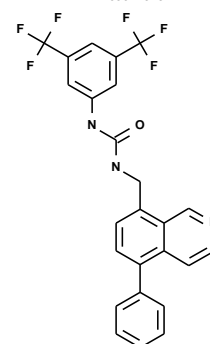

ALB-H09027712

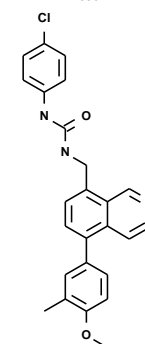

ALB-H09027731

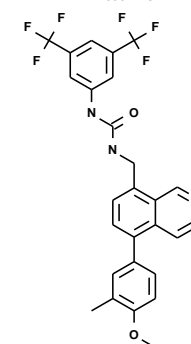

ALB-H09033306

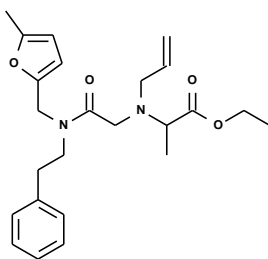

ALB-H09062143

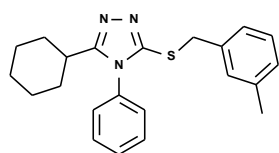

ALB-H09063304

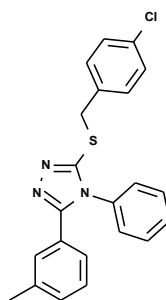

ALB-H09063329

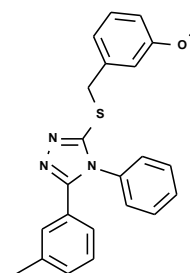

ALB-H09069453

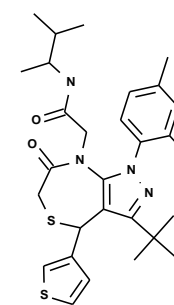

ALB-H09252326

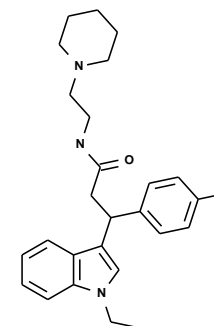

ALB-H09252492

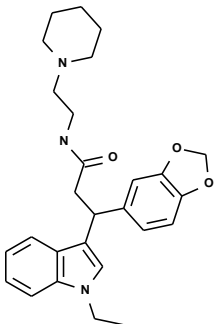

ALB-H09252761

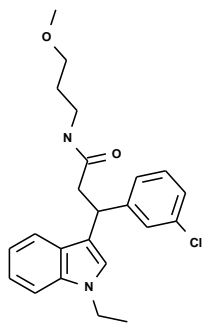

ALB-H09254856

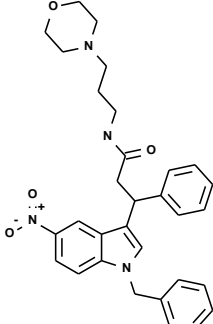

ALB-H09449960

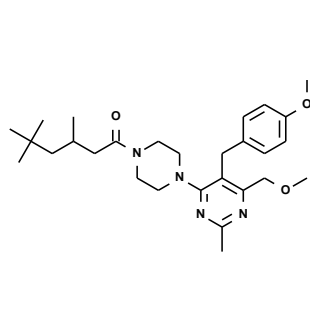

ALB-H09450316

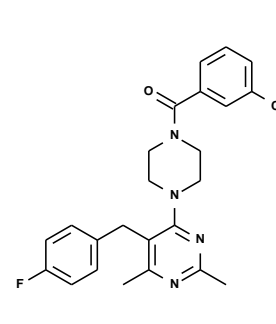

ALB-H09450534

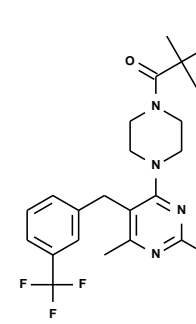

ALB-H09453634

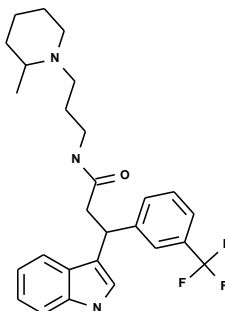

ALB-H09454509

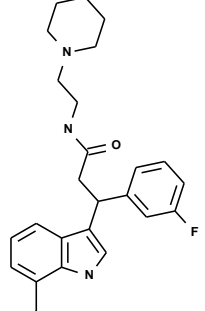

ALB-H09454592

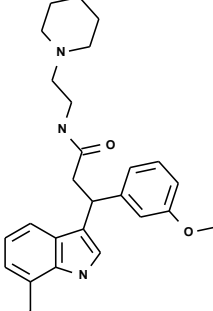

ALB-H09460060

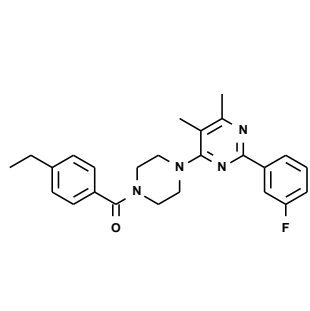

ALB-H09469411

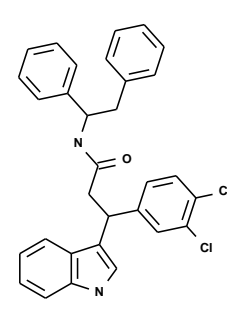

ALB-H09469422

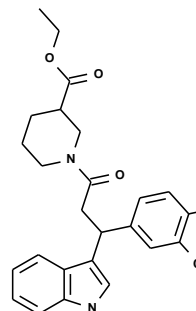

ALB-H09469542

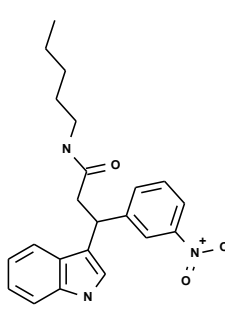

ALB-H09474247

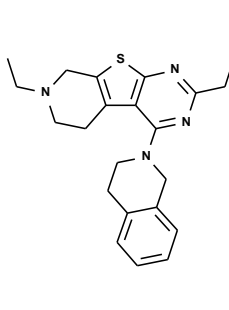

ALB-H09485136

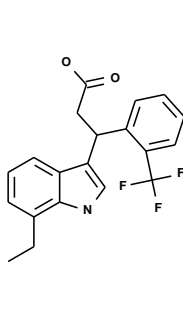

ALB-H09490245

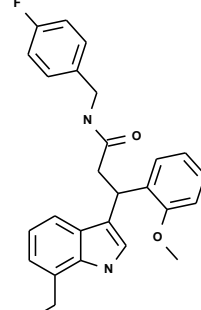

ALB-H09490273

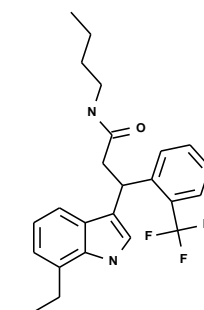

ALB-H09490565

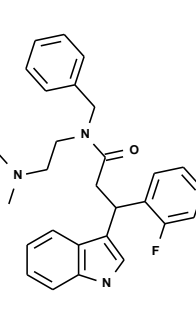

ALB-H09500235

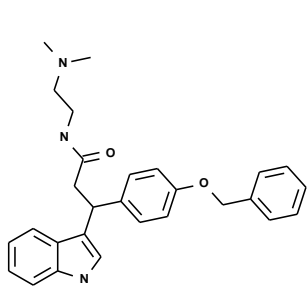

ALB-H09500554

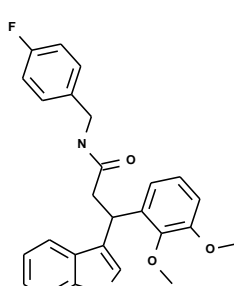

ALB-H09507055

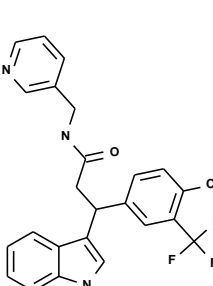

ALB-H09509075

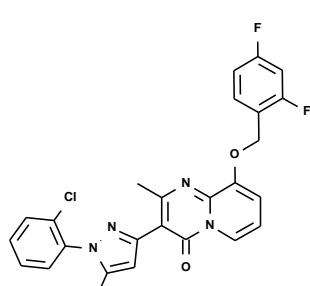

ALB-H09509214

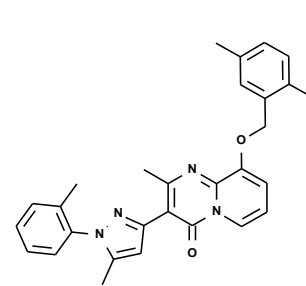

ALB-H09509386

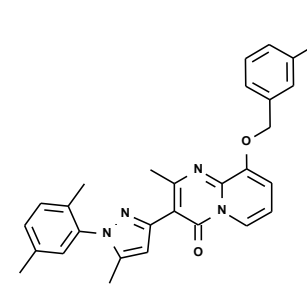



|                                                                                                         |                                                                                                          |                                                                                                           |                                                                                                            |                                                                                                            |                                                                                                            |
|---------------------------------------------------------------------------------------------------------|----------------------------------------------------------------------------------------------------------|-----------------------------------------------------------------------------------------------------------|------------------------------------------------------------------------------------------------------------|------------------------------------------------------------------------------------------------------------|------------------------------------------------------------------------------------------------------------|
| <p>ALB-H09511573</p> 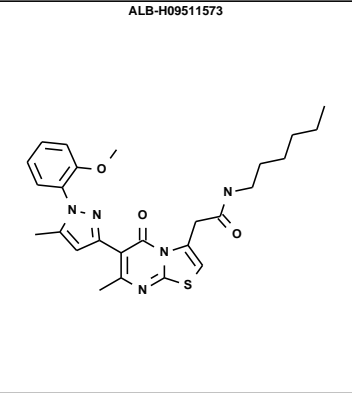    | <p>ALB-H09545669</p>     | <p>ALB-H09546357</p>     | <p>ALB-H09652704</p>     | <p>ALB-H09733014</p>     | <p>ALB-H09828397</p>     |
| <p>ALB-H09978268</p>    | <p>ALB-H09988469</p>    | <p>ALB-H09989501</p>    | <p>ALB-H09990625</p>    | <p>ALB-H10053119</p>    | <p>ALB-H10109623</p>    |
| <p>ALB-H10119147</p>   | <p>ALB-H10119487</p>   | <p>ALB-H10293904</p>   | <p>ALB-H10705246</p>   | <p>ALB-H10705303</p>   | <p>ALB-H10705704</p>   |
| <p>ALB-H10710816</p>  | <p>ALB-H10713342</p>  | <p>ALB-H10716881</p>  | <p>ALB-H10719209</p>  | <p>ALB-H10720953</p>  | <p>ALB-H10721017</p>  |

|                                                                                                          |                                                                                                          |                                                                                                           |                                                                                                            |                                                                                                            |                                                                                                            |
|----------------------------------------------------------------------------------------------------------|----------------------------------------------------------------------------------------------------------|-----------------------------------------------------------------------------------------------------------|------------------------------------------------------------------------------------------------------------|------------------------------------------------------------------------------------------------------------|------------------------------------------------------------------------------------------------------------|
| <p>ALB-H10721531</p> 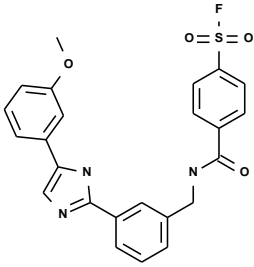    | <p>ALB-H10721849</p>     | <p>ALB-H10722143</p>     | <p>ALB-H10725278</p>     | <p>ALB-H10726123</p>     | <p>ALB-H10726214</p>     |
| <p>ALB-H10726606</p>    | <p>ALB-H10726614</p>    | <p>ALB-H10726913</p>    | <p>ALB-H10727038</p>    | <p>ALB-H10727084</p>    | <p>ALB-H10727259</p>    |
| <p>ALB-H10728280</p>    | <p>ALB-H10728351</p>   | <p>ALB-H10731349</p>   | <p>ALB-H10732494</p>   | <p>ALB-H10732581</p>   | <p>ALB-H10732606</p>   |
| <p>ALB-H10732615</p>  | <p>ALB-H10733662</p>  | <p>ALB-H10736021</p>  | <p>ALB-H10737041</p>  | <p>ALB-H10737303</p>  | <p>ALB-H10740083</p>  |

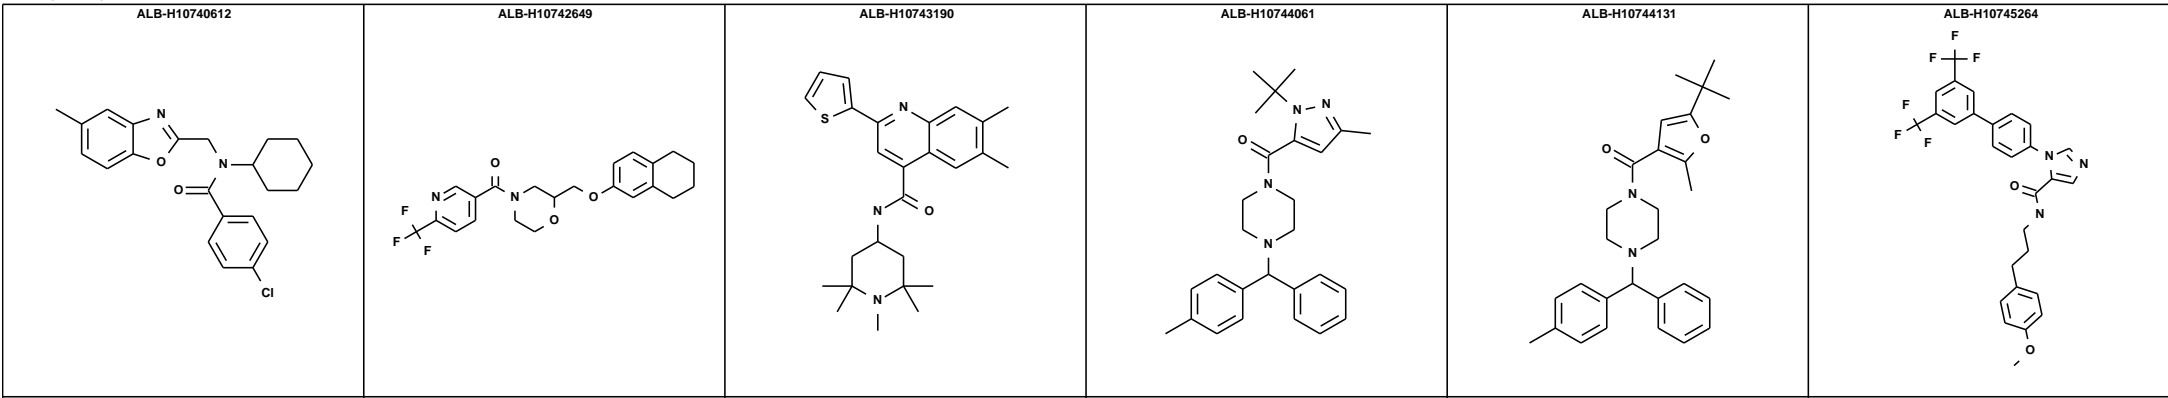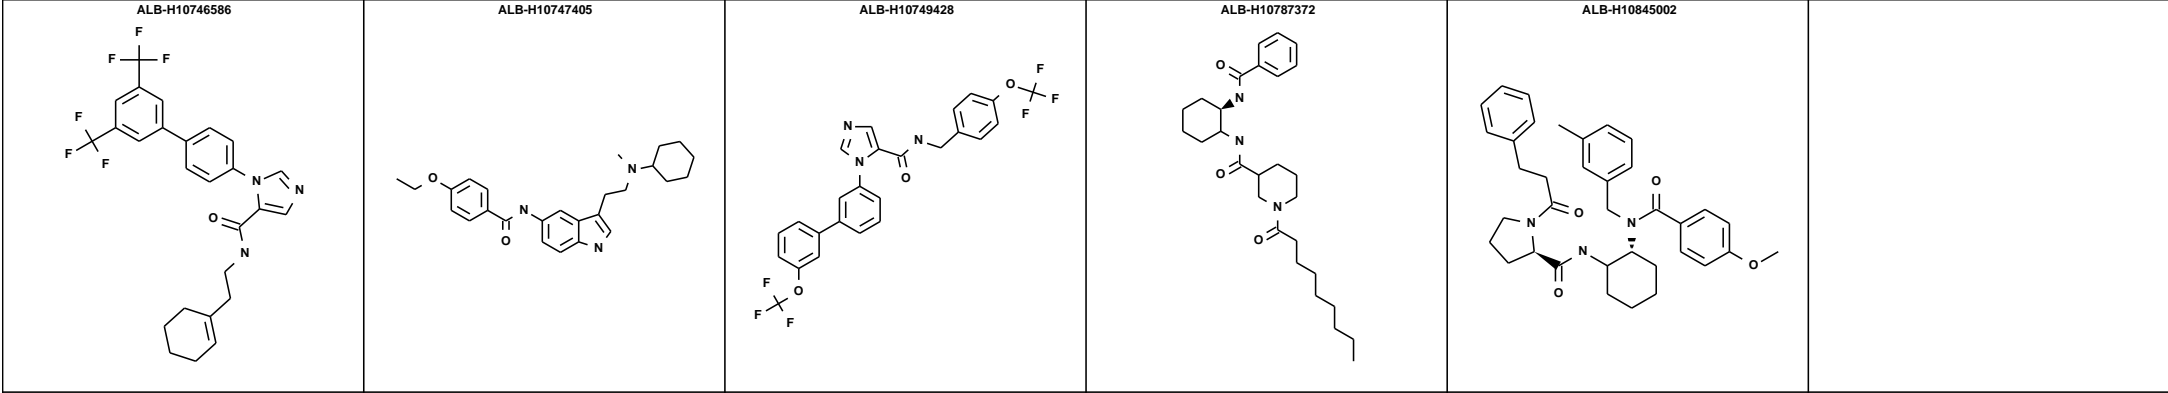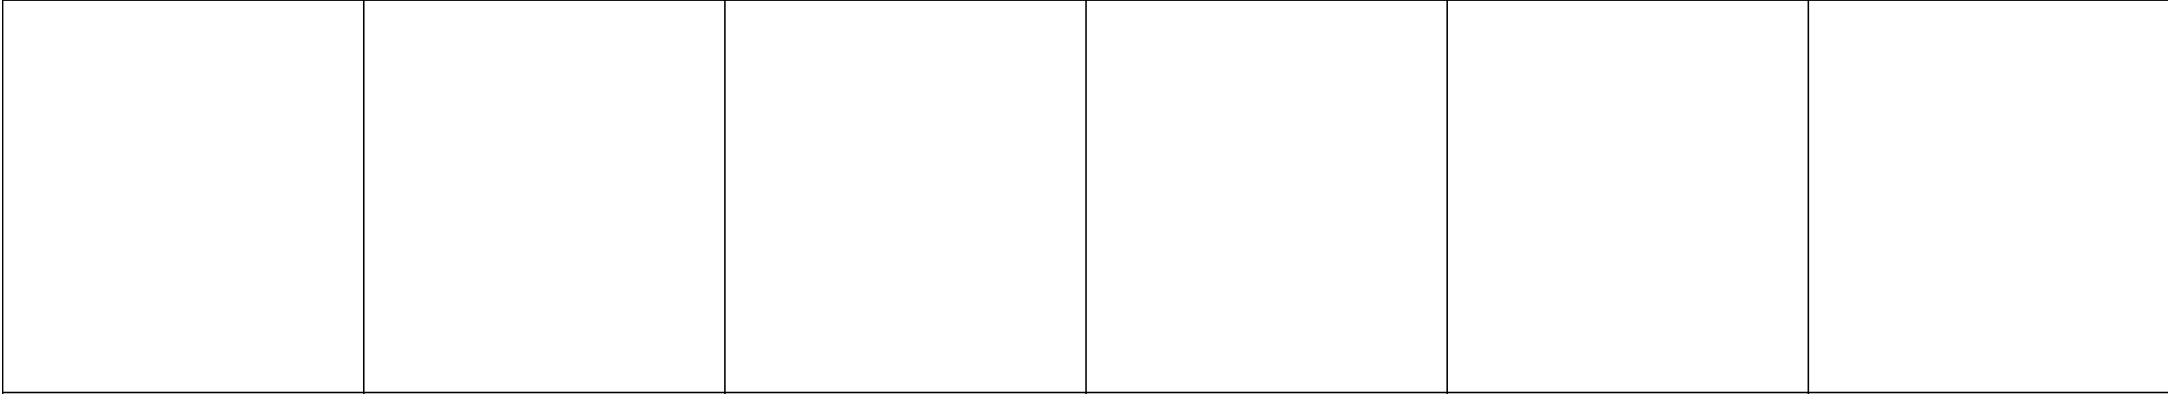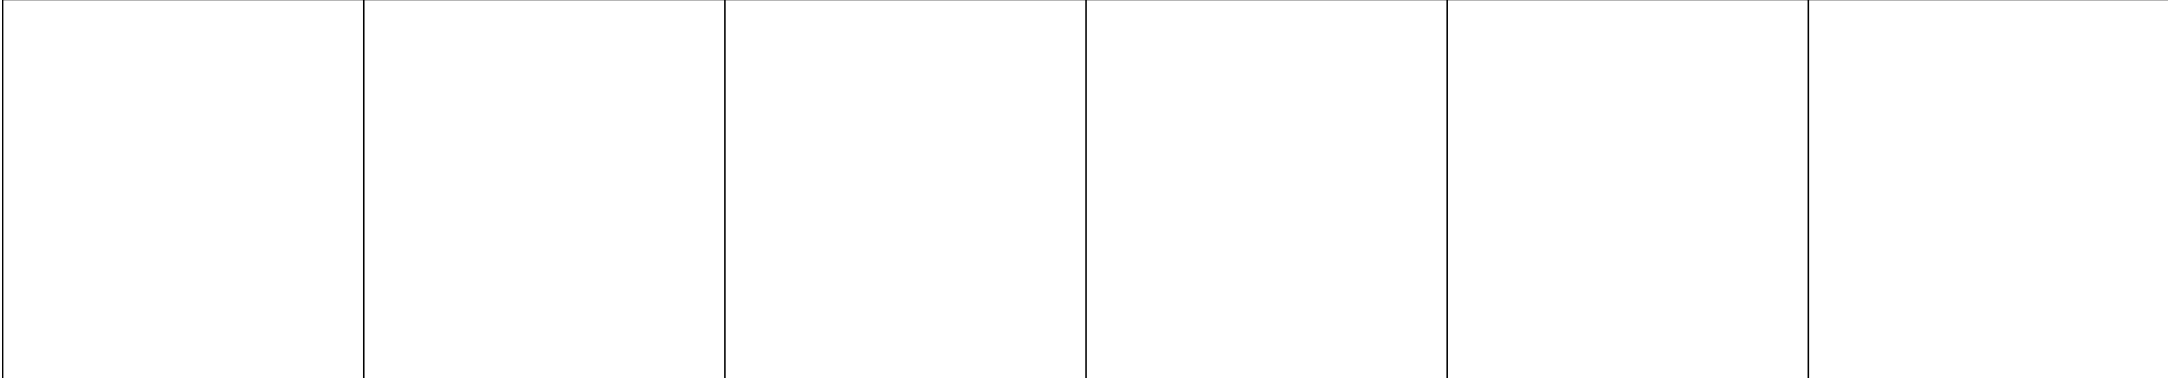

Supplement: pone.0035582.s003.pdf [file pone.0035582.s003.pdf]
