# Supplementary material for: A Chemocentric Approach to the Identification of Cancer Targets
Source: PubMed Central journal article supplement (PMC3338416; doi:10.1371/journal.pone.0035582), 2012-04-25
Supplement: pone.0035582.s002.pdf [file pone.0035582.s002.pdf]

|                                                                                                          |                                                                                                         |                                                                                                           |                                                                                                          |                                                                                                            |                                                                                                            |
|----------------------------------------------------------------------------------------------------------|---------------------------------------------------------------------------------------------------------|-----------------------------------------------------------------------------------------------------------|----------------------------------------------------------------------------------------------------------|------------------------------------------------------------------------------------------------------------|------------------------------------------------------------------------------------------------------------|
| <p>ALB-H03182139</p> 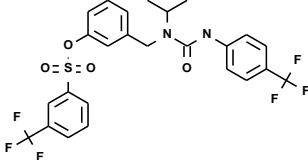    | <p>ALB-H10705704</p>    | <p>ALB-H03182151</p>    | <p>ALB-H10719516</p>   | <p>ALB-H10729695</p>    | <p>ALB-H10721792</p>     |
| <p>ALB-H09997172</p>    | <p>ALB-H00740616</p>   | <p>ALB-H04120057</p>    | <p>ALB-H10715834</p>  | <p>ALB-H01847238</p>    | <p>ALB-H00737497</p>    |
| <p>ALB-H00741347</p>    | <p>ALB-H01835414</p>  | <p>ALB-H02094606</p>   | <p>IP_0036</p>       | <p>ALB-H01278802</p>   | <p>ALB-H09994745</p>   |
| <p>ALB-H09451630</p>  | <p>IP_0085</p>       | <p>ALB-H10717024</p>  | <p>ES_1901</p>      | <p>ALB-H10722657</p>  | <p>ALB-H00884710</p>  |

|                                                                                                         |                                                                                                          |                                                                                                           |                                                                                                            |                                                                                                            |                                                                                                            |
|---------------------------------------------------------------------------------------------------------|----------------------------------------------------------------------------------------------------------|-----------------------------------------------------------------------------------------------------------|------------------------------------------------------------------------------------------------------------|------------------------------------------------------------------------------------------------------------|------------------------------------------------------------------------------------------------------------|
| <p>ALB-H10724022</p> 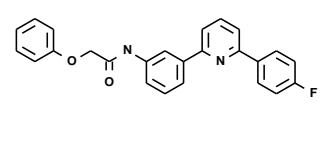   | <p>ALB-H03209455</p>    | <p>AS_0299</p>          | <p>ALB-H10995923</p>    | <p>CE_C068</p>          | <p>FP_0161</p>          |
| <p>ALB-H10726215</p>    | <p>ALB-H01848004</p>    | <p>ALB-H00735714</p>    | <p>IP_0076</p>          | <p>ALB-H00748802</p>    | <p>NB0028</p>           |
| <p>ALB-H04016914</p>   | <p>AQ_0022</p>         | <p>ALB-H01128507</p>   | <p>ALB-H10722128</p>   | <p>ALB-H10729325</p>   | <p>ALB-H10707802</p>   |
| <p>ALB-H10708842</p>  | <p>ALB-H10735471</p>  | <p>ALB-H10721631</p>  | <p>ALB-H01472397</p>  | <p>ALB-H00881482</p>  | <p>ALB-H10721537</p>  |

|                                                                                                         |                                                                                                          |                                                                                                           |                                                                                                            |                                                                                                           |                                                                                                            |
|---------------------------------------------------------------------------------------------------------|----------------------------------------------------------------------------------------------------------|-----------------------------------------------------------------------------------------------------------|------------------------------------------------------------------------------------------------------------|-----------------------------------------------------------------------------------------------------------|------------------------------------------------------------------------------------------------------------|
| <p>ALB-H04324916</p> 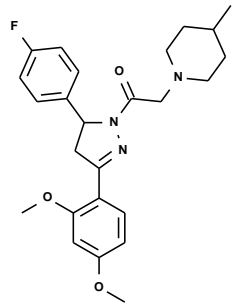   | <p>ALB-H10742806</p>     | <p>ALB-H10706059</p>     | <p>ALB-H10729982</p>     | <p>ALB-H10724339</p>    | <p>ALB-H03037430</p>     |
| <p>ALB-H10711821</p>   | <p>ALB-H10717173</p>    | <p>ALB-H03199406</p>    | <p>BM0447</p>           | <p>ALB-H10742776</p>   | <p>ALB-H03114363</p>    |
| <p>ALB-H00748922</p>  | <p>LP_0194</p>         | <p>ALB-H10721559</p>   | <p>ALB-H01243227</p>   | <p>ALB-H10726740</p>  | <p>ALB-H03051787</p>   |
| <p>ALB-H10726841</p>  | <p>ALB-H04013163</p>  | <p>ALB-H10722264</p>  | <p>ALB-H01832702</p>  | <p>RA_0189</p>       | <p>ALB-H09255461</p>  |

|                                                                                                          |                                                                                                          |                                                                                                           |                                                                                                            |                                                                                                            |                                                                                                            |
|----------------------------------------------------------------------------------------------------------|----------------------------------------------------------------------------------------------------------|-----------------------------------------------------------------------------------------------------------|------------------------------------------------------------------------------------------------------------|------------------------------------------------------------------------------------------------------------|------------------------------------------------------------------------------------------------------------|
| <p>ALB-H10747242</p> 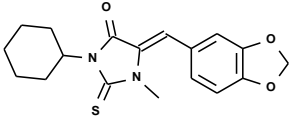    | <p>ALB-H03132805</p>     | <p>ALB-H01332768</p>    | <p>ALB-H01406084</p>    | <p>ALB-H01151710</p>     | <p>ALB-H04334205</p>     |
| <p>ALB-H00740967</p>    | <p>LEU_065</p>          | <p>ALB-H09952353</p>    | <p>ALB-H01139275</p>    | <p>ALB-H10721785</p>    | <p>ALB-H10721911</p>    |
| <p>ALB-H10708673</p>    | <p>ALB-H04045182</p>   | <p>ALB-H10744883</p>   | <p>ALB-H10721847</p>   | <p>ALB-H04143833</p>   | <p>FC74</p>            |
| <p>ALB-H04417939</p>  | <p>ALB-H10730960</p>  | <p>ALB-H01293999</p>  | <p>ALB-H01130458</p>  | <p>ALB-H04153206</p>  | <p>ALB-H00695267</p>  |

|                                                                                                          |                                                                                                          |                                                                                                           |                                                                                                            |                                                                                                            |                                                                                                            |
|----------------------------------------------------------------------------------------------------------|----------------------------------------------------------------------------------------------------------|-----------------------------------------------------------------------------------------------------------|------------------------------------------------------------------------------------------------------------|------------------------------------------------------------------------------------------------------------|------------------------------------------------------------------------------------------------------------|
| <p>ALB-H09064715</p> 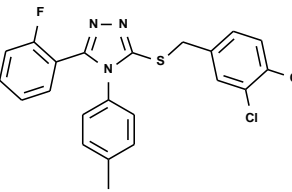    | <p>ALB-H10744553</p>     | <p>ALB-H01130102</p>     | <p>ALB-H00883972</p>    | <p>FP_0120</p>          | <p>ALB-H01130434</p>     |
| <p>ALB-H01851593</p>     | <p>ALB-H04142019</p>    | <p>ALB-H04413622</p>    | <p>ALB-H10746644</p>    | <p>ALB-H00695766</p>    | <p>DID_058</p>          |
| <p>ALB-H10711527</p>   | <p>ALB-H04298034</p>   | <p>ALB-H10720266</p>   | <p>ALB-H09065100</p>   | <p>ALB-H01129322</p>   | <p>ALB-H01851560</p>   |
| <p>ALB-H00752521</p>  | <p>ALB-H01129422</p>  | <p>ALB-H00824371</p>  | <p>ALB-H01835558</p>  | <p>ALB-H10718985</p>  | <p>ALB-H09509601</p>  |

|                                                                                                     |                                                                                                     |                                                                                                       |                                                                                                        |                                                                                                      |                                                                                                        |
|-----------------------------------------------------------------------------------------------------|-----------------------------------------------------------------------------------------------------|-------------------------------------------------------------------------------------------------------|--------------------------------------------------------------------------------------------------------|------------------------------------------------------------------------------------------------------|--------------------------------------------------------------------------------------------------------|
| ALB-H04017974<br>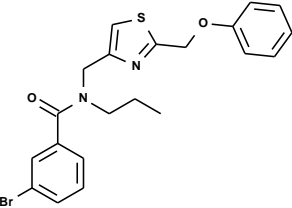   | ALB-H10747384<br>  | ALB-H04354866<br>   | ALB-H10725865<br>    | ALB-H10726355<br>  | ALB-H10109575<br>   |
| ALB-H04003567<br>  | RA_0191<br>        | ALB-H10705716<br>   | ALB-H01288828<br>   | ALB-H10705644<br> | ALB-H09509027<br>   |
| ALB-H09065428<br> | ALB-H10736734<br> | ALB-H10706955<br>  | ALB-H10712333<br>  | CE_C075<br>      | ALB-H04098122<br>  |
| MC_0279<br>      | MC_0575<br>      | ALB-H00849826<br> | ALB-H04354419<br> | MC_0309<br>     | ALB-H01894436<br> |

ALB-H09460191

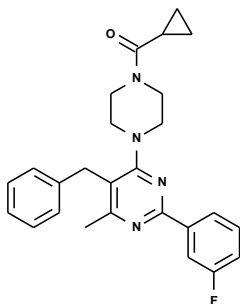

ALB-H04018427

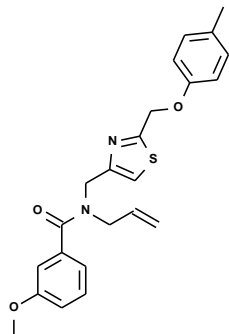

ALB-H04267640

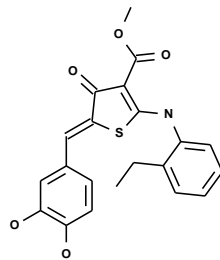

ALB-H09733130

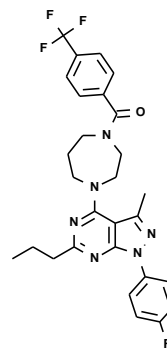

ALB-H04019419

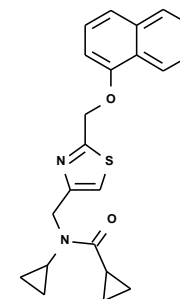

ALB-H04019294

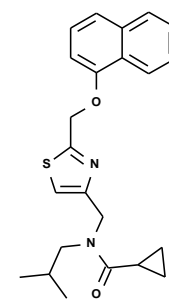

ALB-H10727290

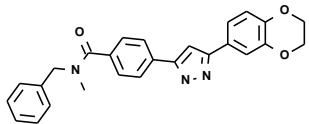

ALB-H10707456

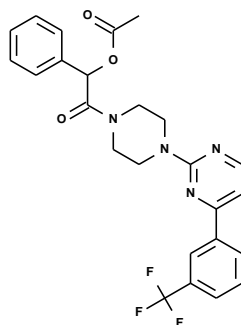

ALB-H03338145

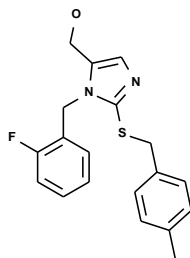

MA16

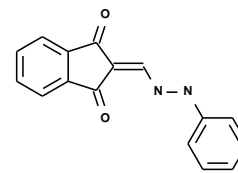

ALB-H01751063

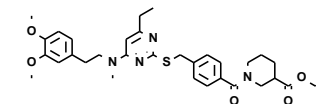

ALB-H10705976

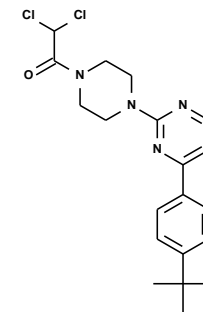

IP\_0025

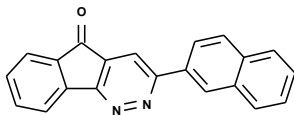

ALB-H01470034

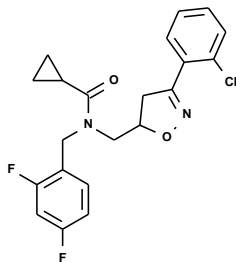

ALB-H01260511

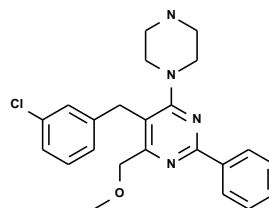

ALB-H04085773

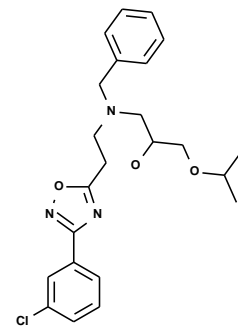

ALB-H10728258

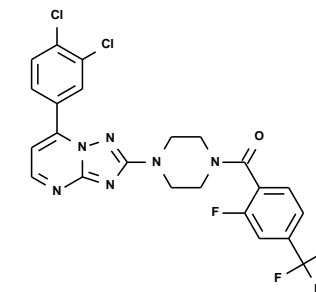

ALB-H10748669

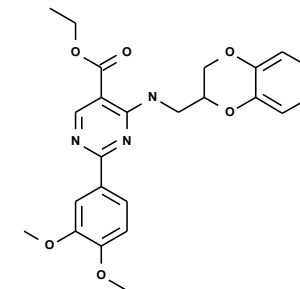

ALB-H04080256

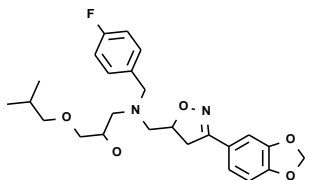

ALB-H10711539

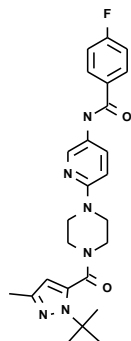

ALB-H10716124

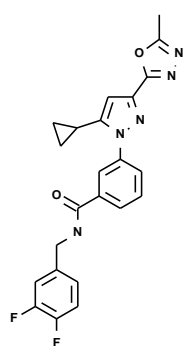

ALB-H03236487

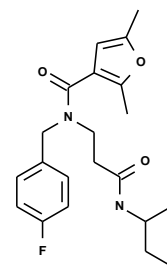

ALB-H01002268

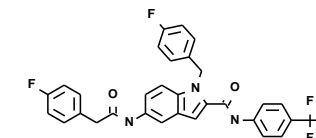

FP\_0159

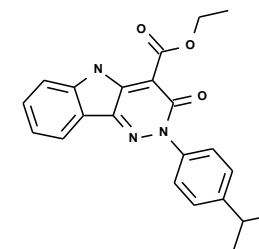

FP\_0159

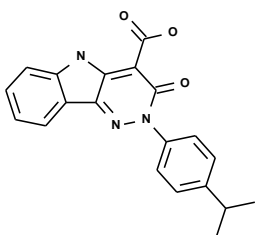

ALB-H09729755

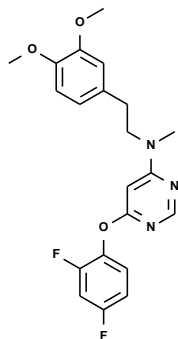

ALB-H09615654

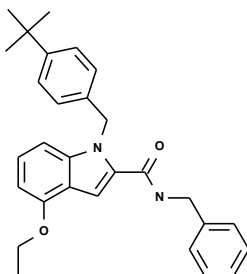

ALB-H10729321

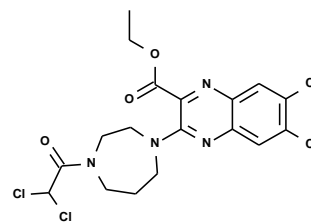

ALB-H0133296

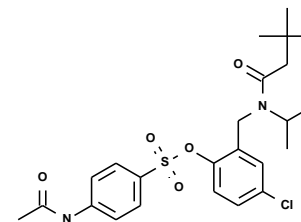

ALB-H03203531

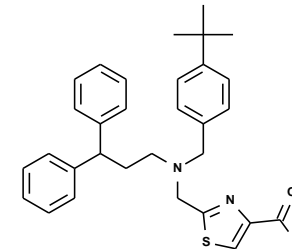

ALB-H04286962

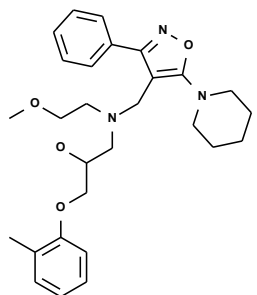

ALB-H09064705

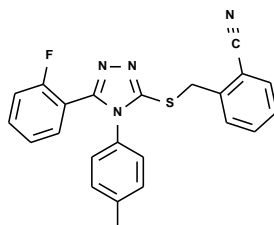

ALB-H01133698

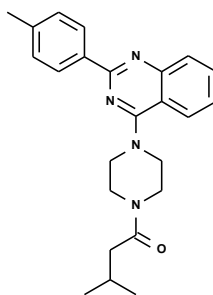

ALB-H03038259

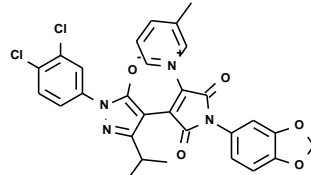

ALB-H09545384

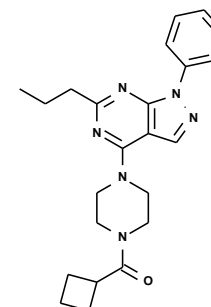

ALB-H09453615

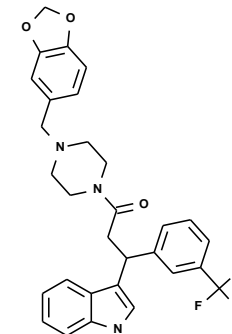

ALB-H09829381

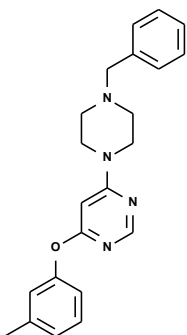

ALB-H04283003

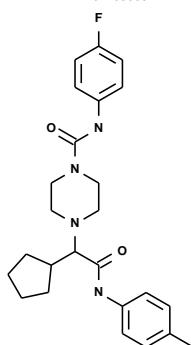

ALB-H04418298

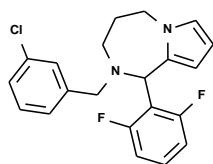

ALB-H10728691

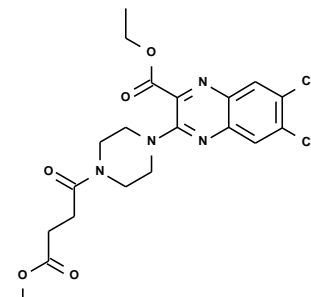

ALB-H01995746

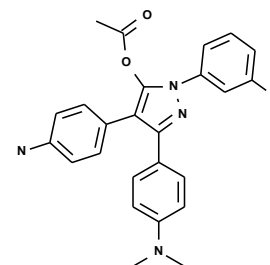

ALB-H05433944

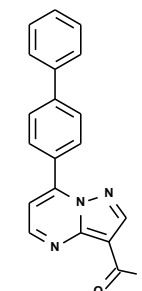

ALB-H10728698

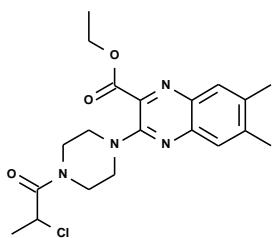

ALB-H09066839

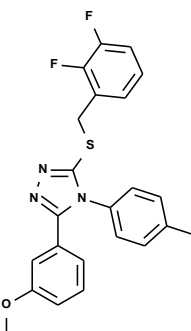

ALB-H10707942

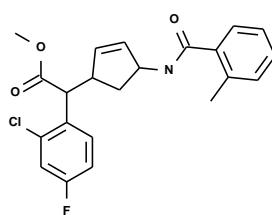

ALB-H01291632

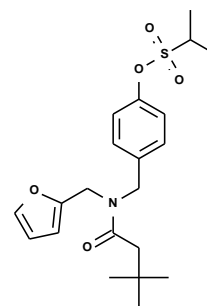

ALB-H01299953

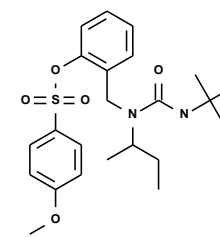

ALB-H09087015

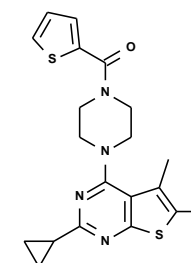



|                                                                                                         |                                                                                                          |                                                                                                           |                                                                                                           |                                                                                                            |                                                                                                            |
|---------------------------------------------------------------------------------------------------------|----------------------------------------------------------------------------------------------------------|-----------------------------------------------------------------------------------------------------------|-----------------------------------------------------------------------------------------------------------|------------------------------------------------------------------------------------------------------------|------------------------------------------------------------------------------------------------------------|
| <p>ALB-H09449983</p> 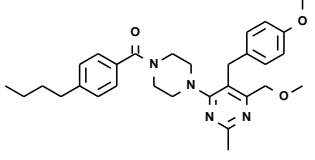   | <p>ALB-H10721841</p>     | <p>ALB-H10723161</p>    | <p>ALB-H10725834</p>   | <p>ALB-H01998559</p>    | <p>ALB-H10738882</p>    |
| <p>ALB-H04088423</p>   | <p>ALB-H10735179</p>    | <p>ALB-H10723272</p>    | <p>ALB-H01472413</p>   | <p>ALB-H09018917</p>    | <p>ALB-H01997030</p>    |
| <p>ALB-H02132937</p>  | <p>ALB-H01822240</p>   | <p>ALB-H10732839</p>   | <p>ALB-H10747417</p>  | <p>DID_080</p>         | <p>ALB-H10709990</p>   |
| <p>ALB-H09067275</p>  | <p>ALB-H04045133</p>  | <p>ALB-H04124557</p>  | <p>LEU_117</p>       | <p>ALB-H04268157</p>  | <p>ALB-H00814576</p>  |

|                                                                                                        |                                                                                                          |                                                                                                           |                                                                                                            |                                                                                                            |                                                                                                            |
|--------------------------------------------------------------------------------------------------------|----------------------------------------------------------------------------------------------------------|-----------------------------------------------------------------------------------------------------------|------------------------------------------------------------------------------------------------------------|------------------------------------------------------------------------------------------------------------|------------------------------------------------------------------------------------------------------------|
| <p>ALB-H10722450</p> 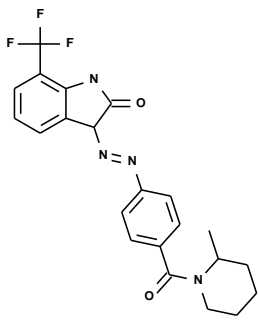  | <p>ALB-H01813536</p>     | <p>ALB-H04351847</p>     | <p>ALB-H04002044</p>     | <p>ALB-H04027795</p>     | <p>ALB-H04130153</p>     |
| <p>ALB-H10721048</p>  | <p>ALB-H03049561</p>    | <p>ALB-H04043494</p>    | <p>ALB-H01742855</p>    | <p>ALB-H04142631</p>    | <p>ALB-H10711494</p>    |
| <p>LEU_122</p>       | <p>ALB-H00740414</p>   | <p>FP_0201</p>         | <p>ALB-H01901798</p>   | <p>ALB-H10721016</p>   | <p>ALB-H10721076</p>   |
| <p>LEU_050</p>      | <p>ALB-H03168506</p>  | <p>ALB-H04017177</p>  | <p>ALB-H10714452</p>  | <p>ALB-H03341365</p>  | <p>ALB-H10747197</p>  |

|                                                                                                        |                                                                                                         |                                                                                                          |                                                                                                           |                                                                                                           |                                                                                                          |
|--------------------------------------------------------------------------------------------------------|---------------------------------------------------------------------------------------------------------|----------------------------------------------------------------------------------------------------------|-----------------------------------------------------------------------------------------------------------|-----------------------------------------------------------------------------------------------------------|----------------------------------------------------------------------------------------------------------|
| <p>ALB-H03339487</p> 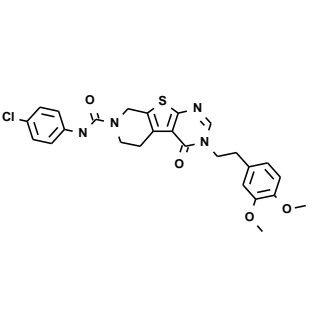   | <p>ALB-H10727289</p>    | <p>ALB-H04088434</p>    | <p>ALB-H10746789</p>    | <p>ALB-H01742478</p>    | <p>ALB-H01286589</p>   |
| <p>ALB-H04136859</p>   | <p>ALB-H04016853</p>   | <p>ALB-H04298432</p>   | <p>ALB-H04153893</p>   | <p>ALB-H04015796</p>   | <p>ALB-H03166827</p>  |
| <p>ALB-H10727041</p>  | <p>ALB-H10736923</p>  | <p>ALB-H00890866</p>  | <p>ALB-H10119217</p>  | <p>ALB-H01742819</p>  | <p></p>                                                                                                  |
