# Supplementary material for: A Chemocentric Approach to the Identification of Cancer Targets
Source: PubMed Central journal article supplement (PMC3338416; doi:10.1371/journal.pone.0035582), 2012-04-25

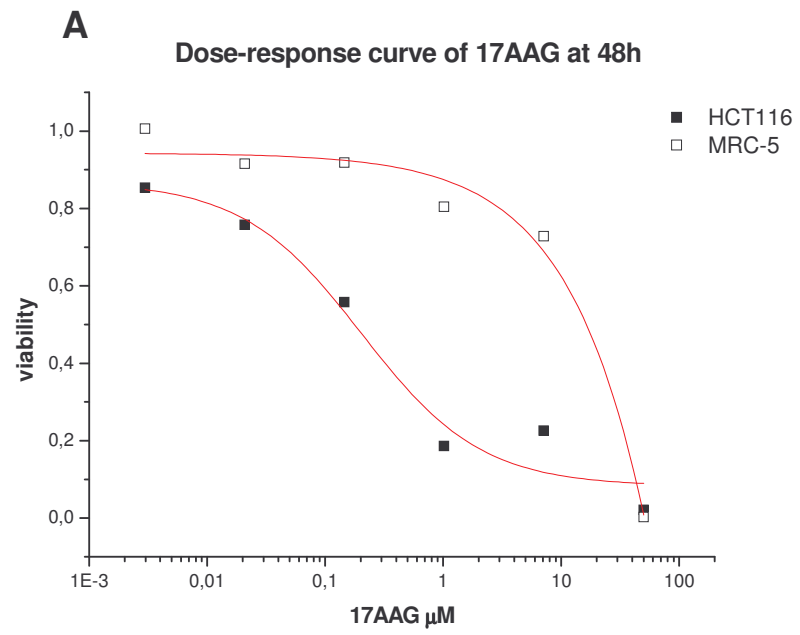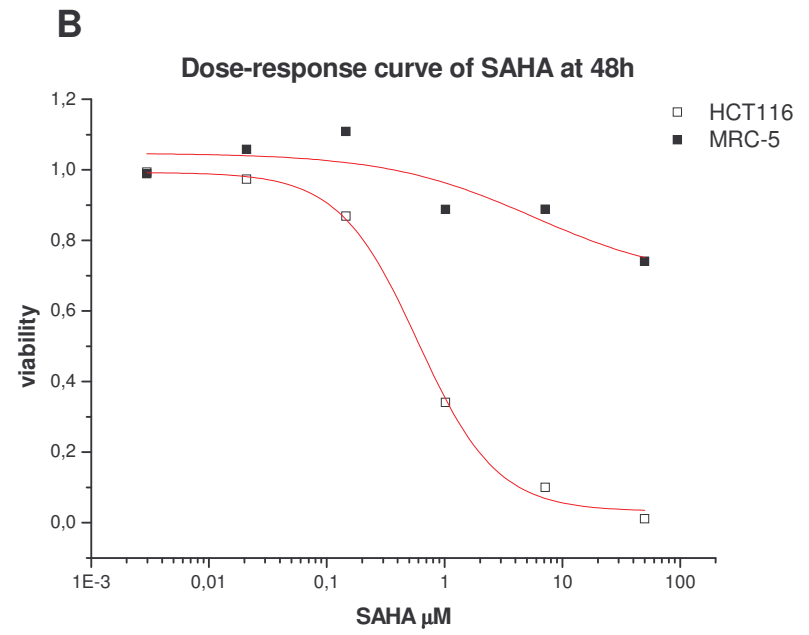

Supplement: pone.0035582.s004.pdf [file pone.0035582.s004.pdf]
