# Supplementary material for: A Chemocentric Approach to the Identification of Cancer Targets
Source: PubMed Central journal article supplement (PMC3338416; doi:10.1371/journal.pone.0035582), 2012-04-25
Supplement: pone.0035582.s005.pdf [file pone.0035582.s005.pdf]

Dose-response curve of MC 309 at 48h

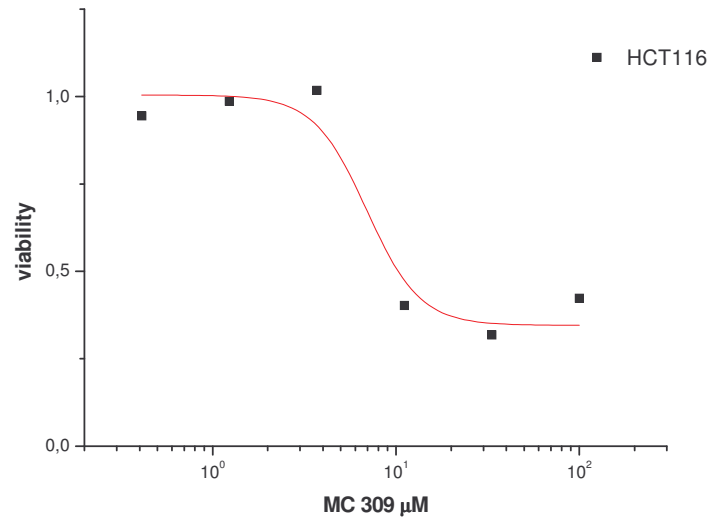

| This Work |       |
|-----------|-------|
| Assay     | pGI50 |
| HCT116    | 5.19  |
| MRC5      | 4.15  |

| PubChem      |       |
|--------------|-------|
| Assay (AID)  | pGI50 |
| HCT116 (79)  | 4.64  |
| HT29 (65)    | 5.74  |
| COLO205 (67) | 5.41  |
| HCT15 (71)   | 4.81  |
| KM12 (73)    | 5.10  |
| SW620 (81)   | 4.80  |
